# Supplementary material for: Splicing of enhancer-associated lincRNAs contributes to enhancer activity
Source: Life Sci Alliance. 2020 Feb 21;3(4):e202000663. doi: 10.26508/lsa.202000663 (PMC7035876; doi:10.26508/lsa.202000663)
Supplement: Supplementary file 1 [file LSA-2020-00663_TableS1.xlsx]

## Sheet: elincRNA_loci
	Supplementary Table ST1
	elincRNA_id	elincRNA_coordinates (mm9)	Associated TIR range	Associated enhancer	Avg_number_exons
	ENSMUSG00000097188	chr19:8797986-8800932 (+)	chr19:8798483..8799587,+	chr19:8798200-8800600;	4
	XLOC_006239	chr11:117837516-117842138 (+)	chr11:117837634..117837674,+	chr11:117837400-117838000;	2
	ENSMUSG00000085412	chr6:52052933-52069727 (+)	chr6:52052935..52052987,+	chr6:52052800-52053000;	14
	XLOC_025721	chr3:121072505-121091611 (+)	chr3:121072500..121072516,+	chr3:121072200-121073800;	3
	ENSMUSG00000086617	chr11:101471928-101477270 (+)	chr11:101471962..101471976,+	chr11:101471800-101472200;	3
	ENSMUSG00000075416	chr2:30568667-30575577 (-)	chr2:30575542..30575553,-	chr2:30574800-30577800;	5
	XLOC_008541	chr12:56608653-56659015 (+)	chr12:56608821..56608847,+	chr12:56608600-56609000;	3
	XLOC_011005	chr13:114525859-114530002 (+)	chr13:114526212..114526236,+	chr13:114526000-114526600;	2
	ENSMUSG00000087523	chr11:70468243-70469995 (-)	chr11:70469969..70470008,-	chr11:70469800-70470400;	2
	XLOC_012717	chr14:65791169-65804492 (+)	chr14:65791169..65791198,+	chr14:65789800-65791200;	3
	ENSMUSG00000092274	chr19:5824708-5845817 (-)	chr19:5841881..5841884,-	chr19:5841400-5844400;	4
	XLOC_000149	chr1:30931864-30943540 (+)	chr1:30931853..30931885,+	chr1:30931200-30932000;	2
	XLOC_010895	chr13:98062138-98066681 (+)	chr13:98062129..98062132,+	chr13:98061200-98063200;	2
	ENSMUSG00000085992	chr11:95084604-95086946 (-)	chr11:95086849..95086948,-	chr11:95086800-95087200;	2
	XLOC_033652	chr6:125382586-125410109 (+)	chr6:125382680..125382802,+	chr6:125382600-125382800;	6
	ENSMUSG00000097052	chr2:26492697-26495764 (-)	chr2:26495599..26495769,-	chr2:26493000-26495800;	4
	ENSMUSG00000092341	chr19:5795690-5802672 (-)	chr19:5796353..5801678,-	chr19:5796200-5801600;	2
	ENSMUSG00000097107	chr10:21550305-21564657 (-)	chr10:21564429..21564674,-	chr10:21563600-21567000;	5
	XLOC_000719	chr1:121202191-121217220 (+)	chr1:121202163..121202209,+	chr1:121201400-121203400;	4
	linc1260	chr11:33434734-33444682 (-)	chr11:33437401..33437452,-	chr11:33437400-33438000;	3
	ENSMUSG00000056738	chr2:129044705-129061340 (+)	chr2:129053760..129053781,+	chr2:128255000-128261000;	5
	ENSMUSG00000086290	chr4:131864593-131866939 (+)	chr4:131864583..131866089,+	chr4:131864600-131866400;	5
	ENSMUSG00000097173	chr11:22500338-22510882 (-)	chr11:22510334..22510374,-	chr11:22510200-22510400;	2
	ENSMUSG00000097050	chr15:102100994-102104552 (+)	chr15:102100971..102101011,+	chr15:102101000-102101400;	2
	XLOC_035789	chr7:80997054-81045284 (+)	chr7:80997313..80997336,+	chr7:80997000-80998200;	2
	ENSMUSG00000086152	chr2:162948342-162969695 (+)	chr2:162948341..162948429,+	chr2:129053600-129053800;	3
	ENSMUSG00000086003	chr11:93994776-94017090 (+)	chr11:93994793..93994804,+	chr11:93994800-93995000;	6
	XLOC_027549	chr4:106532199-106534136 (+)	chr4:106532326..106532360,+	chr4:106531800-106532400;	2
	XLOC_003079	chr10:72097074-72104866 (+)	chr10:72097073..72097082,+	chr10:72097000-72097400;	3
	ENSMUSG00000085156	chr11:6425594-6428763 (-)	chr11:6428423..6428524,-	chr11:6427200-6428600;	4
	linc1557	chr6:125382625-125408897 (+)	chr6:125382680..125382770,+	chr6:125382600-125382800;	4
	ENSMUSG00000097848	chr13:99870657-99877535 (+)	chr13:99870653..99870674,+	chr13:99870600-99871400;	2
	XLOC_003300	chr10:82806952-82814855 (+)	chr10:82806913..82806917,+	chr10:82806600-82807800;	2
	ENSMUSG00000074813	chr2:128021729-128255085 (-)	chr2:128254877..128255098,-	chr2:128254200-128255000;	4
	ENSMUSG00000084829	chr2:171018769-171096850 (+)	chr2:171078772..171078795,+	chr2:170019000-170021400;chr2:171078000-171079200;	5
	XLOC_012856	chr14:99738198-99750535 (+)	chr14:99738355..99738398,+	chr14:99738200-99740800;	2
	XLOC_033363	chr6:88102389-88104966 (+)	chr6:88102369..88102384,+	chr6:88101400-88104400;	2
	XLOC_027498	chr4:99316961-99318579 (+)	chr4:99317126..99317143,+	chr4:99317000-99317600;	2
	ENSMUSG00000097113	chr1:138567315-138587381 (+)	chr1:138572990..138579987,+	chr1:138572600-138574200;chr1:138578000-138580000;	5
	ENSMUSG00000097697	chr7:74929611-74948382 (-)	chr7:74948375..74948418,-	chr7:74948000-74948400;	3
	ENSMUSG00000097514	chr2:170017949-170019553 (-)	chr2:170019533..170019564,-	chr2:162948200-162948400;	2
	XLOC_028145	chr4:141127806-141131481 (+)	chr4:141129180..141129441,+	chr4:141129000-141129600;	2
	ENSMUSG00000086841	chr11:62416379-62418309 (+)	chr11:62416459..62416580,+	chr11:62416400-62419400;	5
	XLOC_030498	chr5:74337633-74340530 (+)	chr5:74337618..74337628,+	chr5:74337400-74337800;	2
	XLOC_016133	chr16:84772549-84774033 (+)	chr16:84773248..84773253,+	chr16:84772600-84773200;	1
	XLOC_021148	chr19:7335517-7336313 (-)	chr19:7335908..7335940,-	chr19:7332800-7336000;	1
	linc1418	chr1:121202185-121202284 (+)	chr1:121202163..121202209,+	chr1:121201400-121203400;	1
	XLOC_000833	chr1:135564142-135566485 (+)	chr1:135564584..135564602,+	chr1:135564400-135564600;	1
	XLOC_033583	chr6:122315739-122316241 (+)	chr6:122315927..122315932,+	chr6:122315800-122316000;	1
	XLOC_000564	chr1:88205133-88206690 (+)	chr1:88205130..88205153,+	chr1:88205000-88206000;	1
	XLOC_015105	chr15:76888265-76889365 (-)	chr15:76888981..76888993,-	chr15:76888400-76889600;	1
	XLOC_015912	chr16:32303909-32305082 (+)	chr16:32303895..32303899,+	chr16:32303000-32304600;	1
	XLOC_026247	chr3:75457250-75459952 (-)	chr3:75459652..75459724,-	chr3:75459600-75460200;	1
	XLOC_025338	chr3:88377003-88377402 (+)	chr3:88377169..88377175,+	chr3:88377000-88378400;	1
	XLOC_019554	chr18:56837020-56837575 (+)	chr18:56837479..56837491,+	chr18:56837400-56838200;	1
	XLOC_037354	chr7:80761834-80762820 (-)	chr7:80762547..80762594,-	chr7:80759600-80762800;	1
	XLOC_006215	chr11:116953308-116954265 (+)	chr11:116953303..116953314,+	chr11:116953200-116953600;	1
	XLOC_025057	chr3:35619769-35621125 (+)	chr3:35621007..35621018,+	chr3:35619000-35622200;	1
	XLOC_009927	chr12:111187031-111188740 (-)	chr12:111187848..111187896,-	chr12:111187600-111188400;	1
	XLOC_000820	chr1:135026005-135026936 (+)	chr1:135026661..135026683,+	chr1:135026400-135027400;	1
	XLOC_000291	chr1:51803846-51804451 (+)	chr1:51803942..51803971,+	chr1:51803400-51804800;	1
	XLOC_018309	chr17:24168770-24169322 (-)	chr17:24169296..24169309,-	chr17:24169000-24169400;	1
	XLOC_011274	chr13:37531369-37531964 (-)	chr13:37531937..37531958,-	chr13:37531600-37532200;	1
	XLOC_004022	chr10:69829774-69832071 (-)	chr10:69830599..69830610,-	chr10:69829800-69832000;	1
	XLOC_025507	chr3:95455389-95456295 (+)	chr3:95455395..95455433,+	chr3:95454800-95455200;chr3:95455400-95455600;	1
	XLOC_022987	chr2:165793743-165795294 (+)	chr2:165794599..165795188,+	chr2:165792800-165795200;	1
	XLOC_002128	chr1:135566621-135568318 (-)	chr1:135567022..135567041,-	chr1:135567000-135567600;	1
	XLOC_014247	chr15:77736036-77737127 (+)	chr15:77736464..77736471,+	chr15:77736200-77737200;	1
	XLOC_015658	chr16:13749111-13750006 (+)	chr16:13749633..13749659,+	chr16:13749200-13750800;	1
	XLOC_010097	chr13:17791134-17794983 (+)	chr13:17792180..17792184,+	chr13:17791400-17792200;	1
	XLOC_027921	chr4:130174495-130175460 (+)	chr4:130174548..130174558,+	chr4:130174400-130176200;	1
	XLOC_040397	chr9:44227398-44227945 (+)	chr9:44227408..44227420,+	chr9:44226600-44227800;	1
	XLOC_021469	chr19:44354830-44355301 (-)	chr19:44355279..44355296,-	chr19:44354000-44356400;	1
	XLOC_038724	chr8:86713767-86715539 (+)	chr8:86713876..86713879,+	chr8:86712600-86715400;	1
	XLOC_022429	chr2:116798439-116799348 (+)	chr2:116798568..116798583,+	chr2:116797600-116799000;	1
	XLOC_020126	chr18:56837013-56837936 (-)	chr18:56837470..56837476,-	chr18:56837400-56838200;	1
	XLOC_032353	chr5:117852504-117855192 (-)	chr5:117852980..117852990,-	chr5:117852600-117853200;	1
	XLOC_033043	chr6:39387892-39388140 (+)	chr6:39387881..39387884,+	chr6:39386600-39388200;	1
	XLOC_004758	chr11:20037249-20039521 (+)	chr11:20038082..20038114,+	chr11:20038000-20038200;	1
	XLOC_039274	chr8:32178049-32178300 (-)	chr8:32178304..32178309,-	chr8:32177000-32179000;	1
	XLOC_022829	chr2:154252339-154254200 (+)	chr2:154252771..154252825,+	chr2:154252600-154253200;	1
	XLOC_007295	chr11:79787120-79789316 (-)	chr11:79787958..79787970,-	chr11:79787800-79788400;	1
	XLOC_017563	chr17:37129288-37131980 (+)	chr17:37131254..37131265,+	chr17:37130800-37132200;	1
	XLOC_016817	chr16:84772678-84774019 (-)	chr16:84772830..84772859,-	chr16:84773200-84773600;	1
	XLOC_036482	chr7:3201216-3202855 (-)	chr7:3201260..3201268,-	chr7:3201200-3201800;	1
	XLOC_018391	chr17:27176142-27177014 (-)	chr17:27176474..27176497,-	chr17:27176400-27176600;	1
	XLOC_029617	chr4:140838533-140840319 (-)	chr4:140840070..140840091,-	chr4:140839400-140840400;	1
	XLOC_035137	chr7:19510761-19511157 (+)	chr7:19510756..19510808,+	chr7:19507000-19510800;	1
	XLOC_007945	chr11:116294651-116295113 (-)	chr11:116295106..116295136,-	chr11:116293400-116295400;	1
	XLOC_021281	chr19:23161475-23162965 (-)	chr19:23162014..23162022,-	chr19:23161800-23164600;	1
	XLOC_025506	chr3:95454805-95455230 (+)	chr3:95454786..95454809,+	chr3:95453400-95454800;	1
	XLOC_002753	chr10:21546359-21547385 (+)	chr10:21547050..21547061,+	chr10:21546800-21547800;	1
	XLOC_015918	chr16:32324193-32324738 (+)	chr16:32324407..32324416,+	chr16:32324400-32324600;	1
	XLOC_027890	chr4:129059633-129060402 (+)	chr4:129059965..129060011,+	chr4:129059800-129060400;	1
	XLOC_036484	chr7:3209749-3212199 (-)	chr7:3212141..3212155,-	chr7:3208000-3213800;	1
	XLOC_016350	chr16:13749559-13750120 (-)	chr16:13750106..13750135,-	chr16:13749200-13750800;	1
	XLOC_017995	chr17:88225276-88229061 (+)	chr17:88225257..88225265,+	chr17:88224400-88225400;	1
	XLOC_040760	chr9:78351270-78351683 (+)	chr9:78351318..78351336,+	chr9:78351200-78351600;	1
	XLOC_023798	chr2:71704980-71705877 (-)	chr2:71705608..71705641,-	chr2:71702600-71706400;	1
	XLOC_032351	chr5:117849082-117849389 (-)	chr5:117849393..117849401,-	chr5:117849000-117849600;	1

## Sheet: multiexonic_elincRNA_gtf
chr1	Cufflinks	exon	30931864	30931936	.	+	.	gene_id "XLOC_000149"; transcript_id "TCONS_00002551"; exon_number "1";
chr1	Cufflinks	exon	30943365	30943540	.	+	.	gene_id "XLOC_000149"; transcript_id "TCONS_00002551"; exon_number "2";
chr1	Cufflinks	exon	121202191	121202284	.	+	.	gene_id "XLOC_000719"; transcript_id "TCONS_00000651"; exon_number "1";
chr1	Cufflinks	exon	121202956	121203174	.	+	.	gene_id "XLOC_000719"; transcript_id "TCONS_00000651"; exon_number "2";
chr1	Cufflinks	exon	121206292	121206747	.	+	.	gene_id "XLOC_000719"; transcript_id "TCONS_00000651"; exon_number "3";
chr1	Cufflinks	exon	121215889	121217220	.	+	.	gene_id "XLOC_000719"; transcript_id "TCONS_00000651"; exon_number "4";
chr10	Cufflinks	exon	72097074	72097197	.	+	.	gene_id "XLOC_003079"; transcript_id "TCONS_00004509"; exon_number "1";
chr10	Cufflinks	exon	72103690	72103793	.	+	.	gene_id "XLOC_003079"; transcript_id "TCONS_00004509"; exon_number "2";
chr10	Cufflinks	exon	72104835	72104866	.	+	.	gene_id "XLOC_003079"; transcript_id "TCONS_00004509"; exon_number "3";
chr10	Cufflinks	exon	82806952	82807443	.	+	.	gene_id "XLOC_003300"; transcript_id "TCONS_00004725"; exon_number "1";
chr10	Cufflinks	exon	82813751	82814855	.	+	.	gene_id "XLOC_003300"; transcript_id "TCONS_00004725"; exon_number "2";
chr11	Cufflinks	exon	117837516	117837802	.	+	.	gene_id "XLOC_006239"; transcript_id "TCONS_00011421"; exon_number "1";
chr11	Cufflinks	exon	117841841	117842138	.	+	.	gene_id "XLOC_006239"; transcript_id "TCONS_00011421"; exon_number "2";
chr12	Cufflinks	exon	56608653	56608923	.	+	.	gene_id "XLOC_008541"; transcript_id "TCONS_00014641"; exon_number "1";
chr12	Cufflinks	exon	56631918	56632025	.	+	.	gene_id "XLOC_008541"; transcript_id "TCONS_00014641"; exon_number "2";
chr12	Cufflinks	exon	56658196	56659015	.	+	.	gene_id "XLOC_008541"; transcript_id "TCONS_00014641"; exon_number "3";
chr13	Cufflinks	exon	98062138	98062298	.	+	.	gene_id "XLOC_010895"; transcript_id "TCONS_00016248"; exon_number "1";
chr13	Cufflinks	exon	98066211	98066681	.	+	.	gene_id "XLOC_010895"; transcript_id "TCONS_00016248"; exon_number "2";
chr13	Cufflinks	exon	114525859	114526754	.	+	.	gene_id "XLOC_011005"; transcript_id "TCONS_00016332"; exon_number "1";
chr13	Cufflinks	exon	114528826	114530002	.	+	.	gene_id "XLOC_011005"; transcript_id "TCONS_00016332"; exon_number "2";
chr14	Cufflinks	exon	65791169	65791271	.	+	.	gene_id "XLOC_012717"; transcript_id "TCONS_00019094"; exon_number "1";
chr14	Cufflinks	exon	65795340	65795515	.	+	.	gene_id "XLOC_012717"; transcript_id "TCONS_00019094"; exon_number "2";
chr14	Cufflinks	exon	65803937	65804492	.	+	.	gene_id "XLOC_012717"; transcript_id "TCONS_00019094"; exon_number "3";
chr14	Cufflinks	exon	99738198	99738463	.	+	.	gene_id "XLOC_012856"; transcript_id "TCONS_00019227"; exon_number "1";
chr14	Cufflinks	exon	99750301	99750535	.	+	.	gene_id "XLOC_012856"; transcript_id "TCONS_00019227"; exon_number "2";
chr3	Cufflinks	exon	121072505	121072606	.	+	.	gene_id "XLOC_025721"; transcript_id "TCONS_00040704"; exon_number "1";
chr3	Cufflinks	exon	121076319	121076435	.	+	.	gene_id "XLOC_025721"; transcript_id "TCONS_00040704"; exon_number "2";
chr3	Cufflinks	exon	121091306	121091611	.	+	.	gene_id "XLOC_025721"; transcript_id "TCONS_00040704"; exon_number "3";
chr4	Cufflinks	exon	99316961	99317235	.	+	.	gene_id "XLOC_027498"; transcript_id "TCONS_00042023"; exon_number "1";
chr4	Cufflinks	exon	99318113	99318579	.	+	.	gene_id "XLOC_027498"; transcript_id "TCONS_00042023"; exon_number "2";
chr4	Cufflinks	exon	106532199	106532873	.	+	.	gene_id "XLOC_027549"; transcript_id "TCONS_00044695"; exon_number "1";
chr4	Cufflinks	exon	106533782	106534136	.	+	.	gene_id "XLOC_027549"; transcript_id "TCONS_00044695"; exon_number "2";
chr4	Cufflinks	exon	141127806	141130331	.	+	.	gene_id "XLOC_028145"; transcript_id "TCONS_00045043"; exon_number "1";
chr4	Cufflinks	exon	141130961	141131481	.	+	.	gene_id "XLOC_028145"; transcript_id "TCONS_00045043"; exon_number "2";
chr5	Cufflinks	exon	74337633	74337863	.	+	.	gene_id "XLOC_030498"; transcript_id "TCONS_00046618"; exon_number "1";
chr5	Cufflinks	exon	74339012	74340530	.	+	.	gene_id "XLOC_030498"; transcript_id "TCONS_00046618"; exon_number "2";
chr6	Cufflinks	exon	88102389	88102575	.	+	.	gene_id "XLOC_033363"; transcript_id "TCONS_00052898"; exon_number "1";
chr6	Cufflinks	exon	88104857	88104966	.	+	.	gene_id "XLOC_033363"; transcript_id "TCONS_00052898"; exon_number "2";
chr6	Cufflinks	exon	125382586	125382829	.	+	.	gene_id "XLOC_033652"; transcript_id "TCONS_00053088"; exon_number "1";
chr6	Cufflinks	exon	125383055	125383255	.	+	.	gene_id "XLOC_033652"; transcript_id "TCONS_00053088"; exon_number "2";
chr6	Cufflinks	exon	125388279	125388399	.	+	.	gene_id "XLOC_033652"; transcript_id "TCONS_00053088"; exon_number "3";
chr6	Cufflinks	exon	125407666	125407772	.	+	.	gene_id "XLOC_033652"; transcript_id "TCONS_00053088"; exon_number "4";
chr6	Cufflinks	exon	125408373	125409241	.	+	.	gene_id "XLOC_033652"; transcript_id "TCONS_00053088"; exon_number "5";
chr6	Cufflinks	exon	125409661	125410109	.	+	.	gene_id "XLOC_033652"; transcript_id "TCONS_00053088"; exon_number "6";
chr7	Cufflinks	exon	80997054	80997597	.	+	.	gene_id "XLOC_035789"; transcript_id "TCONS_00054777"; exon_number "1";
chr7	Cufflinks	exon	81043466	81045284	.	+	.	gene_id "XLOC_035789"; transcript_id "TCONS_00054777"; exon_number "2";
chr1	lincRNA	exon	138567346	138567509	.	+	.	gene_id "ENSMUSG00000097113"; transcript_id "ENSMUST00000180495"; exon_number "1"; gene_name "RP23-302C16.2"; gene_biotype "lincRNA"; transcript_name "RP23-302C16.2-001"; exon_id "ENSMUSE00001203086";
chr1	lincRNA	exon	138569705	138569787	.	+	.	gene_id "ENSMUSG00000097113"; transcript_id "ENSMUST00000180495"; exon_number "2"; gene_name "RP23-302C16.2"; gene_biotype "lincRNA"; transcript_name "RP23-302C16.2-001"; exon_id "ENSMUSE00001157401";
chr1	lincRNA	exon	138571716	138571860	.	+	.	gene_id "ENSMUSG00000097113"; transcript_id "ENSMUST00000180495"; exon_number "3"; gene_name "RP23-302C16.2"; gene_biotype "lincRNA"; transcript_name "RP23-302C16.2-001"; exon_id "ENSMUSE00001203722";
chr1	lincRNA	exon	138578046	138578139	.	+	.	gene_id "ENSMUSG00000097113"; transcript_id "ENSMUST00000180495"; exon_number "4"; gene_name "RP23-302C16.2"; gene_biotype "lincRNA"; transcript_name "RP23-302C16.2-001"; exon_id "ENSMUSE00001103443";
chr1	lincRNA	exon	138585321	138585330	.	+	.	gene_id "ENSMUSG00000097113"; transcript_id "ENSMUST00000180495"; exon_number "5"; gene_name "RP23-302C16.2"; gene_biotype "lincRNA"; transcript_name "RP23-302C16.2-001"; exon_id "ENSMUSE00001098551";
chr1	lincRNA	exon	138580206	138580280	.	+	.	gene_id "ENSMUSG00000097113"; transcript_id "ENSMUST00000180962"; exon_number "1"; gene_name "RP23-302C16.2"; gene_biotype "lincRNA"; transcript_name "RP23-302C16.2-004"; exon_id "ENSMUSE00001167122";
chr1	lincRNA	exon	138585321	138585387	.	+	.	gene_id "ENSMUSG00000097113"; transcript_id "ENSMUST00000180962"; exon_number "2"; gene_name "RP23-302C16.2"; gene_biotype "lincRNA"; transcript_name "RP23-302C16.2-004"; exon_id "ENSMUSE00001171240";
chr1	lincRNA	exon	138587114	138587379	.	+	.	gene_id "ENSMUSG00000097113"; transcript_id "ENSMUST00000180962"; exon_number "3"; gene_name "RP23-302C16.2"; gene_biotype "lincRNA"; transcript_name "RP23-302C16.2-004"; exon_id "ENSMUSE00001195742";
chr1	lincRNA	exon	138573050	138573263	.	+	.	gene_id "ENSMUSG00000097113"; transcript_id "ENSMUST00000181491"; exon_number "1"; gene_name "RP23-302C16.2"; gene_biotype "lincRNA"; transcript_name "RP23-302C16.2-002"; exon_id "ENSMUSE00001183501";
chr1	lincRNA	exon	138573700	138573843	.	+	.	gene_id "ENSMUSG00000097113"; transcript_id "ENSMUST00000181491"; exon_number "2"; gene_name "RP23-302C16.2"; gene_biotype "lincRNA"; transcript_name "RP23-302C16.2-002"; exon_id "ENSMUSE00001097414";
chr1	lincRNA	exon	138578046	138578139	.	+	.	gene_id "ENSMUSG00000097113"; transcript_id "ENSMUST00000181491"; exon_number "3"; gene_name "RP23-302C16.2"; gene_biotype "lincRNA"; transcript_name "RP23-302C16.2-002"; exon_id "ENSMUSE00001103443";
chr1	lincRNA	exon	138579079	138579304	.	+	.	gene_id "ENSMUSG00000097113"; transcript_id "ENSMUST00000181491"; exon_number "4"; gene_name "RP23-302C16.2"; gene_biotype "lincRNA"; transcript_name "RP23-302C16.2-002"; exon_id "ENSMUSE00001186083";
chr1	lincRNA	exon	138579973	138580050	.	+	.	gene_id "ENSMUSG00000097113"; transcript_id "ENSMUST00000181524"; exon_number "1"; gene_name "RP23-302C16.2"; gene_biotype "lincRNA"; transcript_name "RP23-302C16.2-003"; exon_id "ENSMUSE00001097892";
chr1	lincRNA	exon	138585321	138585387	.	+	.	gene_id "ENSMUSG00000097113"; transcript_id "ENSMUST00000181524"; exon_number "2"; gene_name "RP23-302C16.2"; gene_biotype "lincRNA"; transcript_name "RP23-302C16.2-003"; exon_id "ENSMUSE00001171240";
chr1	lincRNA	exon	138587114	138587381	.	+	.	gene_id "ENSMUSG00000097113"; transcript_id "ENSMUST00000181524"; exon_number "3"; gene_name "RP23-302C16.2"; gene_biotype "lincRNA"; transcript_name "RP23-302C16.2-003"; exon_id "ENSMUSE00001204075";
chr10	lincRNA	exon	21550305	21551239	.	-	.	gene_id "ENSMUSG00000097107"; transcript_id "ENSMUST00000180731"; exon_number "5"; gene_name "AC158614.1"; gene_biotype "lincRNA"; transcript_name "AC158614.1-201"; exon_id "ENSMUSE00001152785";
chr10	lincRNA	exon	21554404	21554915	.	-	.	gene_id "ENSMUSG00000097107"; transcript_id "ENSMUST00000180731"; exon_number "4"; gene_name "AC158614.1"; gene_biotype "lincRNA"; transcript_name "AC158614.1-201"; exon_id "ENSMUSE00001102050";
chr10	lincRNA	exon	21556189	21556248	.	-	.	gene_id "ENSMUSG00000097107"; transcript_id "ENSMUST00000180731"; exon_number "3"; gene_name "AC158614.1"; gene_biotype "lincRNA"; transcript_name "AC158614.1-201"; exon_id "ENSMUSE00001178699";
chr10	lincRNA	exon	21564232	21564278	.	-	.	gene_id "ENSMUSG00000097107"; transcript_id "ENSMUST00000180731"; exon_number "2"; gene_name "AC158614.1"; gene_biotype "lincRNA"; transcript_name "AC158614.1-201"; exon_id "ENSMUSE00001187091";
chr10	lincRNA	exon	21564394	21564657	.	-	.	gene_id "ENSMUSG00000097107"; transcript_id "ENSMUST00000180731"; exon_number "1"; gene_name "AC158614.1"; gene_biotype "lincRNA"; transcript_name "AC158614.1-201"; exon_id "ENSMUSE00001203481";
chr11	processed_transcript	exon	62416379	62416525	.	+	.	gene_id "ENSMUSG00000086841"; transcript_id "ENSMUST00000131787"; exon_number "1"; gene_name "2410006H16Rik"; gene_biotype "lincRNA"; transcript_name "2410006H16Rik-001"; exon_id "ENSMUSE00000814299";
chr11	processed_transcript	exon	62416737	62416784	.	+	.	gene_id "ENSMUSG00000086841"; transcript_id "ENSMUST00000131787"; exon_number "2"; gene_name "2410006H16Rik"; gene_biotype "lincRNA"; transcript_name "2410006H16Rik-001"; exon_id "ENSMUSE00000736851";
chr11	processed_transcript	exon	62417099	62417148	.	+	.	gene_id "ENSMUSG00000086841"; transcript_id "ENSMUST00000131787"; exon_number "3"; gene_name "2410006H16Rik"; gene_biotype "lincRNA"; transcript_name "2410006H16Rik-001"; exon_id "ENSMUSE00000731468";
chr11	processed_transcript	exon	62417905	62417968	.	+	.	gene_id "ENSMUSG00000086841"; transcript_id "ENSMUST00000131787"; exon_number "4"; gene_name "2410006H16Rik"; gene_biotype "lincRNA"; transcript_name "2410006H16Rik-001"; exon_id "ENSMUSE00000776179";
chr11	processed_transcript	exon	62418157	62418309	.	+	.	gene_id "ENSMUSG00000086841"; transcript_id "ENSMUST00000131787"; exon_number "5"; gene_name "2410006H16Rik"; gene_biotype "lincRNA"; transcript_name "2410006H16Rik-001"; exon_id "ENSMUSE00000762912";
chr11	processed_transcript	exon	93996974	93997138	.	+	.	gene_id "ENSMUSG00000086003"; transcript_id "ENSMUST00000125406"; exon_number "1"; gene_name "B230206L02Rik"; gene_biotype "lincRNA"; transcript_name "B230206L02Rik-002"; exon_id "ENSMUSE00000826167";
chr11	processed_transcript	exon	93999801	94000159	.	+	.	gene_id "ENSMUSG00000086003"; transcript_id "ENSMUST00000125406"; exon_number "2"; gene_name "B230206L02Rik"; gene_biotype "lincRNA"; transcript_name "B230206L02Rik-002"; exon_id "ENSMUSE00000734808";
chr11	processed_transcript	exon	93994799	93994869	.	+	.	gene_id "ENSMUSG00000086003"; transcript_id "ENSMUST00000132584"; exon_number "1"; gene_name "B230206L02Rik"; gene_biotype "lincRNA"; transcript_name "B230206L02Rik-001"; exon_id "ENSMUSE00000777376";
chr11	processed_transcript	exon	93999801	93999977	.	+	.	gene_id "ENSMUSG00000086003"; transcript_id "ENSMUST00000132584"; exon_number "2"; gene_name "B230206L02Rik"; gene_biotype "lincRNA"; transcript_name "B230206L02Rik-001"; exon_id "ENSMUSE00000729029";
chr11	processed_transcript	exon	94011150	94011279	.	+	.	gene_id "ENSMUSG00000086003"; transcript_id "ENSMUST00000132584"; exon_number "3"; gene_name "B230206L02Rik"; gene_biotype "lincRNA"; transcript_name "B230206L02Rik-001"; exon_id "ENSMUSE00000815053";
chr11	processed_transcript	exon	94012652	94012726	.	+	.	gene_id "ENSMUSG00000086003"; transcript_id "ENSMUST00000132584"; exon_number "4"; gene_name "B230206L02Rik"; gene_biotype "lincRNA"; transcript_name "B230206L02Rik-001"; exon_id "ENSMUSE00000840300";
chr11	processed_transcript	exon	94016770	94016811	.	+	.	gene_id "ENSMUSG00000086003"; transcript_id "ENSMUST00000132584"; exon_number "5"; gene_name "B230206L02Rik"; gene_biotype "lincRNA"; transcript_name "B230206L02Rik-001"; exon_id "ENSMUSE00000787096";
chr11	processed_transcript	exon	94016891	94017090	.	+	.	gene_id "ENSMUSG00000086003"; transcript_id "ENSMUST00000132584"; exon_number "6"; gene_name "B230206L02Rik"; gene_biotype "lincRNA"; transcript_name "B230206L02Rik-001"; exon_id "ENSMUSE00000841884";
chr11	processed_transcript	exon	93994816	93994869	.	+	.	gene_id "ENSMUSG00000086003"; transcript_id "ENSMUST00000155965"; exon_number "1"; gene_name "B230206L02Rik"; gene_biotype "lincRNA"; transcript_name "B230206L02Rik-003"; exon_id "ENSMUSE00000755536";
chr11	processed_transcript	exon	93999801	93999977	.	+	.	gene_id "ENSMUSG00000086003"; transcript_id "ENSMUST00000155965"; exon_number "2"; gene_name "B230206L02Rik"; gene_biotype "lincRNA"; transcript_name "B230206L02Rik-003"; exon_id "ENSMUSE00000729029";
chr11	processed_transcript	exon	94016770	94016811	.	+	.	gene_id "ENSMUSG00000086003"; transcript_id "ENSMUST00000155965"; exon_number "3"; gene_name "B230206L02Rik"; gene_biotype "lincRNA"; transcript_name "B230206L02Rik-003"; exon_id "ENSMUSE00000787096";
chr11	processed_transcript	exon	94016891	94017090	.	+	.	gene_id "ENSMUSG00000086003"; transcript_id "ENSMUST00000155965"; exon_number "4"; gene_name "B230206L02Rik"; gene_biotype "lincRNA"; transcript_name "B230206L02Rik-003"; exon_id "ENSMUSE00000841884";
chr11	lincRNA	exon	101471928	101472025	.	+	.	gene_id "ENSMUSG00000086617"; transcript_id "ENSMUST00000131042"; exon_number "1"; gene_name "Gm11635"; gene_biotype "lincRNA"; transcript_name "Gm11635-002"; exon_id "ENSMUSE00000738504";
chr11	lincRNA	exon	101472406	101472489	.	+	.	gene_id "ENSMUSG00000086617"; transcript_id "ENSMUST00000131042"; exon_number "2"; gene_name "Gm11635"; gene_biotype "lincRNA"; transcript_name "Gm11635-002"; exon_id "ENSMUSE00000833264";
chr11	lincRNA	exon	101472014	101472223	.	+	.	gene_id "ENSMUSG00000086617"; transcript_id "ENSMUST00000139424"; exon_number "1"; gene_name "Gm11635"; gene_biotype "lincRNA"; transcript_name "Gm11635-001"; exon_id "ENSMUSE00000743725";
chr11	lincRNA	exon	101472406	101472491	.	+	.	gene_id "ENSMUSG00000086617"; transcript_id "ENSMUST00000139424"; exon_number "2"; gene_name "Gm11635"; gene_biotype "lincRNA"; transcript_name "Gm11635-001"; exon_id "ENSMUSE00000724689";
chr11	lincRNA	exon	101477095	101477270	.	+	.	gene_id "ENSMUSG00000086617"; transcript_id "ENSMUST00000139424"; exon_number "3"; gene_name "Gm11635"; gene_biotype "lincRNA"; transcript_name "Gm11635-001"; exon_id "ENSMUSE00000765092";
chr11	processed_transcript	exon	6425628	6425820	.	-	.	gene_id "ENSMUSG00000085156"; transcript_id "ENSMUST00000124818"; exon_number "3"; gene_name "Gm11974"; gene_biotype "lincRNA"; transcript_name "Gm11974-004"; exon_id "ENSMUSE00000786112";
chr11	processed_transcript	exon	6426358	6426440	.	-	.	gene_id "ENSMUSG00000085156"; transcript_id "ENSMUST00000124818"; exon_number "2"; gene_name "Gm11974"; gene_biotype "lincRNA"; transcript_name "Gm11974-004"; exon_id "ENSMUSE00000831771";
chr11	processed_transcript	exon	6428309	6428444	.	-	.	gene_id "ENSMUSG00000085156"; transcript_id "ENSMUST00000124818"; exon_number "1"; gene_name "Gm11974"; gene_biotype "lincRNA"; transcript_name "Gm11974-004"; exon_id "ENSMUSE00000801871";
chr11	processed_transcript	exon	6425595	6425820	.	-	.	gene_id "ENSMUSG00000085156"; transcript_id "ENSMUST00000129570"; exon_number "2"; gene_name "Gm11974"; gene_biotype "lincRNA"; transcript_name "Gm11974-002"; exon_id "ENSMUSE00000830986";
chr11	processed_transcript	exon	6426358	6426733	.	-	.	gene_id "ENSMUSG00000085156"; transcript_id "ENSMUST00000129570"; exon_number "1"; gene_name "Gm11974"; gene_biotype "lincRNA"; transcript_name "Gm11974-002"; exon_id "ENSMUSE00000775502";
chr11	processed_transcript	exon	6427902	6428377	.	-	.	gene_id "ENSMUSG00000085156"; transcript_id "ENSMUST00000134527"; exon_number "2"; gene_name "Gm11974"; gene_biotype "lincRNA"; transcript_name "Gm11974-001"; exon_id "ENSMUSE00000751292";
chr11	processed_transcript	exon	6428551	6428749	.	-	.	gene_id "ENSMUSG00000085156"; transcript_id "ENSMUST00000134527"; exon_number "1"; gene_name "Gm11974"; gene_biotype "lincRNA"; transcript_name "Gm11974-001"; exon_id "ENSMUSE00000845509";
chr11	processed_transcript	exon	6425594	6425820	.	-	.	gene_id "ENSMUSG00000085156"; transcript_id "ENSMUST00000147762"; exon_number "4"; gene_name "Gm11974"; gene_biotype "lincRNA"; transcript_name "Gm11974-003"; exon_id "ENSMUSE00000833427";
chr11	processed_transcript	exon	6426358	6426440	.	-	.	gene_id "ENSMUSG00000085156"; transcript_id "ENSMUST00000147762"; exon_number "3"; gene_name "Gm11974"; gene_biotype "lincRNA"; transcript_name "Gm11974-003"; exon_id "ENSMUSE00000831771";
chr11	processed_transcript	exon	6428309	6428377	.	-	.	gene_id "ENSMUSG00000085156"; transcript_id "ENSMUST00000147762"; exon_number "2"; gene_name "Gm11974"; gene_biotype "lincRNA"; transcript_name "Gm11974-003"; exon_id "ENSMUSE00000813559";
chr11	processed_transcript	exon	6428551	6428763	.	-	.	gene_id "ENSMUSG00000085156"; transcript_id "ENSMUST00000147762"; exon_number "1"; gene_name "Gm11974"; gene_biotype "lincRNA"; transcript_name "Gm11974-003"; exon_id "ENSMUSE00000772782";
chr11	lincRNA	exon	22500338	22500609	.	-	.	gene_id "ENSMUSG00000097173"; transcript_id "ENSMUST00000180581"; exon_number "2"; gene_name "AL806526.1"; gene_biotype "lincRNA"; transcript_name "AL806526.1-201"; exon_id "ENSMUSE00001153639";
chr11	lincRNA	exon	22510221	22510882	.	-	.	gene_id "ENSMUSG00000097173"; transcript_id "ENSMUST00000180581"; exon_number "1"; gene_name "AL806526.1"; gene_biotype "lincRNA"; transcript_name "AL806526.1-201"; exon_id "ENSMUSE00001142955";
chr11	lincRNA	exon	70468243	70468398	.	-	.	gene_id "ENSMUSG00000087523"; transcript_id "ENSMUST00000131642"; exon_number "2"; gene_name "Gm12319"; gene_biotype "lincRNA"; transcript_name "Gm12319-001"; exon_id "ENSMUSE00000787669";
chr11	lincRNA	exon	70469795	70469995	.	-	.	gene_id "ENSMUSG00000087523"; transcript_id "ENSMUST00000131642"; exon_number "1"; gene_name "Gm12319"; gene_biotype "lincRNA"; transcript_name "Gm12319-001"; exon_id "ENSMUSE00000756404";
chr11	lincRNA	exon	95084604	95085138	.	-	.	gene_id "ENSMUSG00000085992"; transcript_id "ENSMUST00000150818"; exon_number "2"; gene_name "Gm11515"; gene_biotype "lincRNA"; transcript_name "Gm11515-001"; exon_id "ENSMUSE00000823598";
chr11	lincRNA	exon	95086781	95086946	.	-	.	gene_id "ENSMUSG00000085992"; transcript_id "ENSMUST00000150818"; exon_number "1"; gene_name "Gm11515"; gene_biotype "lincRNA"; transcript_name "Gm11515-001"; exon_id "ENSMUSE00000834758";
chr13	lincRNA	exon	99870661	99870780	.	+	.	gene_id "ENSMUSG00000097848"; transcript_id "ENSMUST00000181742"; exon_number "1"; gene_name "AC127583.1"; gene_biotype "lincRNA"; transcript_name "AC127583.1-201"; exon_id "ENSMUSE00001200591";
chr13	lincRNA	exon	99875933	99877535	.	+	.	gene_id "ENSMUSG00000097848"; transcript_id "ENSMUST00000181742"; exon_number "2"; gene_name "AC127583.1"; gene_biotype "lincRNA"; transcript_name "AC127583.1-201"; exon_id "ENSMUSE00001127012";
chr15	lincRNA	exon	102100994	102101761	.	+	.	gene_id "ENSMUSG00000097050"; transcript_id "ENSMUST00000181801"; exon_number "1"; gene_name "AC163291.1"; gene_biotype "lincRNA"; transcript_name "AC163291.1-201"; exon_id "ENSMUSE00001166587";
chr15	lincRNA	exon	102103129	102104552	.	+	.	gene_id "ENSMUSG00000097050"; transcript_id "ENSMUST00000181801"; exon_number "2"; gene_name "AC163291.1"; gene_biotype "lincRNA"; transcript_name "AC163291.1-201"; exon_id "ENSMUSE00001196581";
chr19	lincRNA	exon	8797986	8798679	.	+	.	gene_id "ENSMUSG00000097188"; transcript_id "ENSMUST00000180819"; exon_number "1"; gene_name "AC025794.1"; gene_biotype "lincRNA"; transcript_name "AC025794.1-201"; exon_id "ENSMUSE00001099773";
chr19	lincRNA	exon	8798893	8800013	.	+	.	gene_id "ENSMUSG00000097188"; transcript_id "ENSMUST00000180819"; exon_number "2"; gene_name "AC025794.1"; gene_biotype "lincRNA"; transcript_name "AC025794.1-201"; exon_id "ENSMUSE00001107892";
chr19	lincRNA	exon	8800272	8800592	.	+	.	gene_id "ENSMUSG00000097188"; transcript_id "ENSMUST00000180819"; exon_number "3"; gene_name "AC025794.1"; gene_biotype "lincRNA"; transcript_name "AC025794.1-201"; exon_id "ENSMUSE00001155739";
chr19	lincRNA	exon	8800729	8800931	.	+	.	gene_id "ENSMUSG00000097188"; transcript_id "ENSMUST00000180819"; exon_number "4"; gene_name "AC025794.1"; gene_biotype "lincRNA"; transcript_name "AC025794.1-201"; exon_id "ENSMUSE00001146078";
chr19	lincRNA	exon	8797986	8799746	.	+	.	gene_id "ENSMUSG00000097188"; transcript_id "ENSMUST00000181422"; exon_number "1"; gene_name "AC025794.1"; gene_biotype "lincRNA"; transcript_name "AC025794.1-202"; exon_id "ENSMUSE00001105412";
chr19	lincRNA	exon	8799975	8800932	.	+	.	gene_id "ENSMUSG00000097188"; transcript_id "ENSMUST00000181422"; exon_number "2"; gene_name "AC025794.1"; gene_biotype "lincRNA"; transcript_name "AC025794.1-202"; exon_id "ENSMUSE00001203626";
chr19	lincRNA	exon	5795691	5795785	.	-	.	gene_id "ENSMUSG00000092341"; transcript_id "ENSMUST00000173314"; exon_number "2"; gene_name "Malat1"; gene_biotype "lincRNA"; transcript_name "Malat1-002"; exon_id "ENSMUSE00000931655";
chr19	lincRNA	exon	5797004	5797464	.	-	.	gene_id "ENSMUSG00000092341"; transcript_id "ENSMUST00000173314"; exon_number "1"; gene_name "Malat1"; gene_biotype "lincRNA"; transcript_name "Malat1-002"; exon_id "ENSMUSE00000936071";
chr19	lincRNA	exon	5801916	5801966	.	-	.	gene_id "ENSMUSG00000092341"; transcript_id "ENSMUST00000173499"; exon_number "2"; gene_name "Malat1"; gene_biotype "lincRNA"; transcript_name "Malat1-003"; exon_id "ENSMUSE00000932413";
chr19	lincRNA	exon	5802238	5802671	.	-	.	gene_id "ENSMUSG00000092341"; transcript_id "ENSMUST00000173499"; exon_number "1"; gene_name "Malat1"; gene_biotype "lincRNA"; transcript_name "Malat1-003"; exon_id "ENSMUSE00000931030";
chr19	lincRNA	exon	5801943	5802023	.	-	.	gene_id "ENSMUSG00000092341"; transcript_id "ENSMUST00000173523"; exon_number "2"; gene_name "Malat1"; gene_biotype "lincRNA"; transcript_name "Malat1-004"; exon_id "ENSMUSE00000915465";
chr19	lincRNA	exon	5802066	5802640	.	-	.	gene_id "ENSMUSG00000092341"; transcript_id "ENSMUST00000173523"; exon_number "1"; gene_name "Malat1"; gene_biotype "lincRNA"; transcript_name "Malat1-004"; exon_id "ENSMUSE00000937243";
chr19	lincRNA	exon	5795694	5795785	.	-	.	gene_id "ENSMUSG00000092341"; transcript_id "ENSMUST00000174808"; exon_number "2"; gene_name "Malat1"; gene_biotype "lincRNA"; transcript_name "Malat1-005"; exon_id "ENSMUSE00000937176";
chr19	lincRNA	exon	5796389	5796952	.	-	.	gene_id "ENSMUSG00000092341"; transcript_id "ENSMUST00000174808"; exon_number "1"; gene_name "Malat1"; gene_biotype "lincRNA"; transcript_name "Malat1-005"; exon_id "ENSMUSE00000941606";
chr2	lincRNA	exon	129044705	129045134	.	+	.	gene_id "ENSMUSG00000056738"; transcript_id "ENSMUST00000143346"; exon_number "1"; gene_name "A730036I17Rik"; gene_biotype "lincRNA"; transcript_name "A730036I17Rik-001"; exon_id "ENSMUSE00000868315";
chr2	lincRNA	exon	129051144	129051332	.	+	.	gene_id "ENSMUSG00000056738"; transcript_id "ENSMUST00000143346"; exon_number "2"; gene_name "A730036I17Rik"; gene_biotype "lincRNA"; transcript_name "A730036I17Rik-001"; exon_id "ENSMUSE00001166046";
chr2	lincRNA	exon	129051457	129051631	.	+	.	gene_id "ENSMUSG00000056738"; transcript_id "ENSMUST00000143346"; exon_number "3"; gene_name "A730036I17Rik"; gene_biotype "lincRNA"; transcript_name "A730036I17Rik-001"; exon_id "ENSMUSE00001174693";
chr2	lincRNA	exon	129057545	129059521	.	+	.	gene_id "ENSMUSG00000056738"; transcript_id "ENSMUST00000143346"; exon_number "4"; gene_name "A730036I17Rik"; gene_biotype "lincRNA"; transcript_name "A730036I17Rik-001"; exon_id "ENSMUSE00000415106";
chr2	lincRNA	exon	129060681	129061340	.	+	.	gene_id "ENSMUSG00000056738"; transcript_id "ENSMUST00000143346"; exon_number "5"; gene_name "A730036I17Rik"; gene_biotype "lincRNA"; transcript_name "A730036I17Rik-001"; exon_id "ENSMUSE00000751445";
chr2	lincRNA	exon	129053758	129053940	.	+	.	gene_id "ENSMUSG00000056738"; transcript_id "ENSMUST00000148548"; exon_number "1"; gene_name "A730036I17Rik"; gene_biotype "lincRNA"; transcript_name "A730036I17Rik-002"; exon_id "ENSMUSE00000741019";
chr2	lincRNA	exon	129057545	129057707	.	+	.	gene_id "ENSMUSG00000056738"; transcript_id "ENSMUST00000148548"; exon_number "2"; gene_name "A730036I17Rik"; gene_biotype "lincRNA"; transcript_name "A730036I17Rik-002"; exon_id "ENSMUSE00000822353";
chr2	lincRNA	exon	129044764	129045134	.	+	.	gene_id "ENSMUSG00000056738"; transcript_id "ENSMUST00000165505"; exon_number "1"; gene_name "A730036I17Rik"; gene_biotype "lincRNA"; transcript_name "A730036I17Rik-201"; exon_id "ENSMUSE00000913100";
chr2	lincRNA	exon	129051144	129051332	.	+	.	gene_id "ENSMUSG00000056738"; transcript_id "ENSMUST00000165505"; exon_number "2"; gene_name "A730036I17Rik"; gene_biotype "lincRNA"; transcript_name "A730036I17Rik-201"; exon_id "ENSMUSE00001187749";
chr2	lincRNA	exon	129051457	129051631	.	+	.	gene_id "ENSMUSG00000056738"; transcript_id "ENSMUST00000165505"; exon_number "3"; gene_name "A730036I17Rik"; gene_biotype "lincRNA"; transcript_name "A730036I17Rik-201"; exon_id "ENSMUSE00001146343";
chr2	lincRNA	exon	129057545	129058990	.	+	.	gene_id "ENSMUSG00000056738"; transcript_id "ENSMUST00000165505"; exon_number "4"; gene_name "A730036I17Rik"; gene_biotype "lincRNA"; transcript_name "A730036I17Rik-201"; exon_id "ENSMUSE00000889019";
chr2	lincRNA	exon	162948342	162948514	.	+	.	gene_id "ENSMUSG00000086152"; transcript_id "ENSMUST00000144092"; exon_number "1"; gene_name "Gm11454"; gene_biotype "lincRNA"; transcript_name "Gm11454-001"; exon_id "ENSMUSE00000794299";
chr2	lincRNA	exon	162966572	162966706	.	+	.	gene_id "ENSMUSG00000086152"; transcript_id "ENSMUST00000144092"; exon_number "2"; gene_name "Gm11454"; gene_biotype "lincRNA"; transcript_name "Gm11454-001"; exon_id "ENSMUSE00000768516";
chr2	lincRNA	exon	162969290	162969695	.	+	.	gene_id "ENSMUSG00000086152"; transcript_id "ENSMUST00000144092"; exon_number "3"; gene_name "Gm11454"; gene_biotype "lincRNA"; transcript_name "Gm11454-001"; exon_id "ENSMUSE00000811148";
chr2	lincRNA	exon	171018769	171018934	.	+	.	gene_id "ENSMUSG00000084829"; transcript_id "ENSMUST00000125631"; exon_number "1"; gene_name "Gm14266"; gene_biotype "lincRNA"; transcript_name "Gm14266-002"; exon_id "ENSMUSE00000773488";
chr2	lincRNA	exon	171082411	171082639	.	+	.	gene_id "ENSMUSG00000084829"; transcript_id "ENSMUST00000125631"; exon_number "2"; gene_name "Gm14266"; gene_biotype "lincRNA"; transcript_name "Gm14266-002"; exon_id "ENSMUSE00000796475";
chr2	lincRNA	exon	171090520	171090629	.	+	.	gene_id "ENSMUSG00000084829"; transcript_id "ENSMUST00000125631"; exon_number "3"; gene_name "Gm14266"; gene_biotype "lincRNA"; transcript_name "Gm14266-002"; exon_id "ENSMUSE00000842273";
chr2	lincRNA	exon	171094488	171094700	.	+	.	gene_id "ENSMUSG00000084829"; transcript_id "ENSMUST00000125631"; exon_number "4"; gene_name "Gm14266"; gene_biotype "lincRNA"; transcript_name "Gm14266-002"; exon_id "ENSMUSE00000837513";
chr2	lincRNA	exon	171078784	171078875	.	+	.	gene_id "ENSMUSG00000084829"; transcript_id "ENSMUST00000146542"; exon_number "1"; gene_name "Gm14266"; gene_biotype "lincRNA"; transcript_name "Gm14266-001"; exon_id "ENSMUSE00000815250";
chr2	lincRNA	exon	171082411	171082639	.	+	.	gene_id "ENSMUSG00000084829"; transcript_id "ENSMUST00000146542"; exon_number "2"; gene_name "Gm14266"; gene_biotype "lincRNA"; transcript_name "Gm14266-001"; exon_id "ENSMUSE00000796475";
chr2	lincRNA	exon	171090520	171090629	.	+	.	gene_id "ENSMUSG00000084829"; transcript_id "ENSMUST00000146542"; exon_number "3"; gene_name "Gm14266"; gene_biotype "lincRNA"; transcript_name "Gm14266-001"; exon_id "ENSMUSE00000842273";
chr2	lincRNA	exon	171094537	171094700	.	+	.	gene_id "ENSMUSG00000084829"; transcript_id "ENSMUST00000146542"; exon_number "4"; gene_name "Gm14266"; gene_biotype "lincRNA"; transcript_name "Gm14266-001"; exon_id "ENSMUSE00000750258";
chr2	lincRNA	exon	171096379	171096850	.	+	.	gene_id "ENSMUSG00000084829"; transcript_id "ENSMUST00000146542"; exon_number "5"; gene_name "Gm14266"; gene_biotype "lincRNA"; transcript_name "Gm14266-001"; exon_id "ENSMUSE00000769310";
chr2	lincRNA	exon	26492697	26493153	.	-	.	gene_id "ENSMUSG00000097052"; transcript_id "ENSMUST00000180659"; exon_number "4"; gene_name "AL732311.1"; gene_biotype "lincRNA"; transcript_name "AL732311.1-202"; exon_id "ENSMUSE00001172936";
chr2	lincRNA	exon	26493561	26493615	.	-	.	gene_id "ENSMUSG00000097052"; transcript_id "ENSMUST00000180659"; exon_number "3"; gene_name "AL732311.1"; gene_biotype "lincRNA"; transcript_name "AL732311.1-202"; exon_id "ENSMUSE00001099213";
chr2	lincRNA	exon	26494950	26494991	.	-	.	gene_id "ENSMUSG00000097052"; transcript_id "ENSMUST00000180659"; exon_number "2"; gene_name "AL732311.1"; gene_biotype "lincRNA"; transcript_name "AL732311.1-202"; exon_id "ENSMUSE00001189675";
chr2	lincRNA	exon	26495578	26495764	.	-	.	gene_id "ENSMUSG00000097052"; transcript_id "ENSMUST00000180659"; exon_number "1"; gene_name "AL732311.1"; gene_biotype "lincRNA"; transcript_name "AL732311.1-202"; exon_id "ENSMUSE00001143538";
chr2	lincRNA	exon	26492769	26494932	.	-	.	gene_id "ENSMUSG00000097052"; transcript_id "ENSMUST00000181621"; exon_number "3"; gene_name "AL732311.1"; gene_biotype "lincRNA"; transcript_name "AL732311.1-201"; exon_id "ENSMUSE00001141300";
chr2	lincRNA	exon	26494963	26494991	.	-	.	gene_id "ENSMUSG00000097052"; transcript_id "ENSMUST00000181621"; exon_number "2"; gene_name "AL732311.1"; gene_biotype "lincRNA"; transcript_name "AL732311.1-201"; exon_id "ENSMUSE00001176815";
chr2	lincRNA	exon	26495578	26495750	.	-	.	gene_id "ENSMUSG00000097052"; transcript_id "ENSMUST00000181621"; exon_number "1"; gene_name "AL732311.1"; gene_biotype "lincRNA"; transcript_name "AL732311.1-201"; exon_id "ENSMUSE00001198982";
chr2	retained_intron	exon	30568670	30568934	.	-	.	gene_id "ENSMUSG00000075416"; transcript_id "ENSMUST00000131207"; exon_number "2"; gene_name "Gm14488"; gene_biotype "lincRNA"; transcript_name "Gm14488-002"; exon_id "ENSMUSE00000646102";
chr2	retained_intron	exon	30569888	30572563	.	-	.	gene_id "ENSMUSG00000075416"; transcript_id "ENSMUST00000131207"; exon_number "1"; gene_name "Gm14488"; gene_biotype "lincRNA"; transcript_name "Gm14488-002"; exon_id "ENSMUSE00000776605";
chr2	processed_transcript	exon	30568667	30568934	.	-	.	gene_id "ENSMUSG00000075416"; transcript_id "ENSMUST00000134755"; exon_number "5"; gene_name "Gm14488"; gene_biotype "lincRNA"; transcript_name "Gm14488-001"; exon_id "ENSMUSE00000798431";
chr2	processed_transcript	exon	30569888	30569921	.	-	.	gene_id "ENSMUSG00000075416"; transcript_id "ENSMUST00000134755"; exon_number "4"; gene_name "Gm14488"; gene_biotype "lincRNA"; transcript_name "Gm14488-001"; exon_id "ENSMUSE00000776210";
chr2	processed_transcript	exon	30570383	30570498	.	-	.	gene_id "ENSMUSG00000075416"; transcript_id "ENSMUST00000134755"; exon_number "3"; gene_name "Gm14488"; gene_biotype "lincRNA"; transcript_name "Gm14488-001"; exon_id "ENSMUSE00000820626";
chr2	processed_transcript	exon	30575226	30575390	.	-	.	gene_id "ENSMUSG00000075416"; transcript_id "ENSMUST00000134755"; exon_number "2"; gene_name "Gm14488"; gene_biotype "lincRNA"; transcript_name "Gm14488-001"; exon_id "ENSMUSE00000836673";
chr2	processed_transcript	exon	30575493	30575577	.	-	.	gene_id "ENSMUSG00000075416"; transcript_id "ENSMUST00000134755"; exon_number "1"; gene_name "Gm14488"; gene_biotype "lincRNA"; transcript_name "Gm14488-001"; exon_id "ENSMUSE00000784749";
chr2	processed_transcript	exon	128197843	128198163	.	-	.	gene_id "ENSMUSG00000074813"; transcript_id "ENSMUST00000125354"; exon_number "2"; gene_name "Gm14005"; gene_biotype "lincRNA"; transcript_name "Gm14005-006"; exon_id "ENSMUSE00000766264";
chr2	processed_transcript	exon	128254530	128254629	.	-	.	gene_id "ENSMUSG00000074813"; transcript_id "ENSMUST00000125354"; exon_number "1"; gene_name "Gm14005"; gene_biotype "lincRNA"; transcript_name "Gm14005-006"; exon_id "ENSMUSE00000830226";
chr2	processed_transcript	exon	128171388	128171596	.	-	.	gene_id "ENSMUSG00000074813"; transcript_id "ENSMUST00000132149"; exon_number "2"; gene_name "Gm14005"; gene_biotype "lincRNA"; transcript_name "Gm14005-004"; exon_id "ENSMUSE00000756443";
chr2	processed_transcript	exon	128254830	128254976	.	-	.	gene_id "ENSMUSG00000074813"; transcript_id "ENSMUST00000132149"; exon_number "1"; gene_name "Gm14005"; gene_biotype "lincRNA"; transcript_name "Gm14005-004"; exon_id "ENSMUSE00000755049";
chr2	processed_transcript	exon	128126469	128126732	.	-	.	gene_id "ENSMUSG00000074813"; transcript_id "ENSMUST00000135433"; exon_number "3"; gene_name "Gm14005"; gene_biotype "lincRNA"; transcript_name "Gm14005-003"; exon_id "ENSMUSE00000777674";
chr2	processed_transcript	exon	128156581	128156785	.	-	.	gene_id "ENSMUSG00000074813"; transcript_id "ENSMUST00000135433"; exon_number "2"; gene_name "Gm14005"; gene_biotype "lincRNA"; transcript_name "Gm14005-003"; exon_id "ENSMUSE00000683573";
chr2	processed_transcript	exon	128254830	128255059	.	-	.	gene_id "ENSMUSG00000074813"; transcript_id "ENSMUST00000135433"; exon_number "1"; gene_name "Gm14005"; gene_biotype "lincRNA"; transcript_name "Gm14005-003"; exon_id "ENSMUSE00000809766";
chr2	processed_transcript	exon	128197842	128198163	.	-	.	gene_id "ENSMUSG00000074813"; transcript_id "ENSMUST00000138486"; exon_number "2"; gene_name "Gm14005"; gene_biotype "lincRNA"; transcript_name "Gm14005-005"; exon_id "ENSMUSE00000784648";
chr2	processed_transcript	exon	128254830	128254922	.	-	.	gene_id "ENSMUSG00000074813"; transcript_id "ENSMUST00000138486"; exon_number "1"; gene_name "Gm14005"; gene_biotype "lincRNA"; transcript_name "Gm14005-005"; exon_id "ENSMUSE00000751570";
chr2	processed_transcript	exon	128021729	128021919	.	-	.	gene_id "ENSMUSG00000074813"; transcript_id "ENSMUST00000143065"; exon_number "4"; gene_name "Gm14005"; gene_biotype "lincRNA"; transcript_name "Gm14005-002"; exon_id "ENSMUSE00000841415";
chr2	processed_transcript	exon	128022064	128022177	.	-	.	gene_id "ENSMUSG00000074813"; transcript_id "ENSMUST00000143065"; exon_number "3"; gene_name "Gm14005"; gene_biotype "lincRNA"; transcript_name "Gm14005-002"; exon_id "ENSMUSE00000792420";
chr2	processed_transcript	exon	128156581	128156785	.	-	.	gene_id "ENSMUSG00000074813"; transcript_id "ENSMUST00000143065"; exon_number "2"; gene_name "Gm14005"; gene_biotype "lincRNA"; transcript_name "Gm14005-002"; exon_id "ENSMUSE00000683573";
chr2	processed_transcript	exon	128254830	128254876	.	-	.	gene_id "ENSMUSG00000074813"; transcript_id "ENSMUST00000143065"; exon_number "1"; gene_name "Gm14005"; gene_biotype "lincRNA"; transcript_name "Gm14005-002"; exon_id "ENSMUSE00000777701";
chr2	processed_transcript	exon	128143025	128143408	.	-	.	gene_id "ENSMUSG00000074813"; transcript_id "ENSMUST00000151427"; exon_number "3"; gene_name "Gm14005"; gene_biotype "lincRNA"; transcript_name "Gm14005-001"; exon_id "ENSMUSE00000829448";
chr2	processed_transcript	exon	128156581	128156785	.	-	.	gene_id "ENSMUSG00000074813"; transcript_id "ENSMUST00000151427"; exon_number "2"; gene_name "Gm14005"; gene_biotype "lincRNA"; transcript_name "Gm14005-001"; exon_id "ENSMUSE00000683573";
chr2	processed_transcript	exon	128254830	128255085	.	-	.	gene_id "ENSMUSG00000074813"; transcript_id "ENSMUST00000151427"; exon_number "1"; gene_name "Gm14005"; gene_biotype "lincRNA"; transcript_name "Gm14005-001"; exon_id "ENSMUSE00000683574";
chr2	processed_transcript	exon	128143201	128143408	.	-	.	gene_id "ENSMUSG00000074813"; transcript_id "ENSMUST00000154173"; exon_number "3"; gene_name "Gm14005"; gene_biotype "lincRNA"; transcript_name "Gm14005-007"; exon_id "ENSMUSE00000731606";
chr2	processed_transcript	exon	128156581	128156708	.	-	.	gene_id "ENSMUSG00000074813"; transcript_id "ENSMUST00000154173"; exon_number "2"; gene_name "Gm14005"; gene_biotype "lincRNA"; transcript_name "Gm14005-007"; exon_id "ENSMUSE00000783748";
chr2	processed_transcript	exon	128254830	128254906	.	-	.	gene_id "ENSMUSG00000074813"; transcript_id "ENSMUST00000154173"; exon_number "1"; gene_name "Gm14005"; gene_biotype "lincRNA"; transcript_name "Gm14005-007"; exon_id "ENSMUSE00000817994";
chr2	lincRNA	exon	170017949	170019296	.	-	.	gene_id "ENSMUSG00000097514"; transcript_id "ENSMUST00000180625"; exon_number "2"; gene_name "AL844576.1"; gene_biotype "lincRNA"; transcript_name "AL844576.1-201"; exon_id "ENSMUSE00001120398";
chr2	lincRNA	exon	170019453	170019553	.	-	.	gene_id "ENSMUSG00000097514"; transcript_id "ENSMUST00000180625"; exon_number "1"; gene_name "AL844576.1"; gene_biotype "lincRNA"; transcript_name "AL844576.1-201"; exon_id "ENSMUSE00001139022";
chr4	processed_transcript	exon	131864666	131864822	.	+	.	gene_id "ENSMUSG00000086290"; transcript_id "ENSMUST00000126380"; exon_number "1"; gene_name "Snhg12"; gene_biotype "lincRNA"; transcript_name "Snhg12-005"; exon_id "ENSMUSE00000799099";
chr4	processed_transcript	exon	131865753	131865818	.	+	.	gene_id "ENSMUSG00000086290"; transcript_id "ENSMUST00000126380"; exon_number "2"; gene_name "Snhg12"; gene_biotype "lincRNA"; transcript_name "Snhg12-005"; exon_id "ENSMUSE00000780841";
chr4	processed_transcript	exon	131866066	131866674	.	+	.	gene_id "ENSMUSG00000086290"; transcript_id "ENSMUST00000126380"; exon_number "3"; gene_name "Snhg12"; gene_biotype "lincRNA"; transcript_name "Snhg12-005"; exon_id "ENSMUSE00000792510";
chr4	processed_transcript	exon	131865544	131865818	.	+	.	gene_id "ENSMUSG00000086290"; transcript_id "ENSMUST00000128000"; exon_number "1"; gene_name "Snhg12"; gene_biotype "lincRNA"; transcript_name "Snhg12-003"; exon_id "ENSMUSE00000729873";
chr4	processed_transcript	exon	131866066	131866130	.	+	.	gene_id "ENSMUSG00000086290"; transcript_id "ENSMUST00000128000"; exon_number "2"; gene_name "Snhg12"; gene_biotype "lincRNA"; transcript_name "Snhg12-003"; exon_id "ENSMUSE00000725178";
chr4	processed_transcript	exon	131866366	131866419	.	+	.	gene_id "ENSMUSG00000086290"; transcript_id "ENSMUST00000128000"; exon_number "3"; gene_name "Snhg12"; gene_biotype "lincRNA"; transcript_name "Snhg12-003"; exon_id "ENSMUSE00000756485";
chr4	processed_transcript	exon	131866749	131866939	.	+	.	gene_id "ENSMUSG00000086290"; transcript_id "ENSMUST00000128000"; exon_number "4"; gene_name "Snhg12"; gene_biotype "lincRNA"; transcript_name "Snhg12-003"; exon_id "ENSMUSE00000804727";
chr4	processed_transcript	exon	131865733	131866130	.	+	.	gene_id "ENSMUSG00000086290"; transcript_id "ENSMUST00000128131"; exon_number "1"; gene_name "Snhg12"; gene_biotype "lincRNA"; transcript_name "Snhg12-004"; exon_id "ENSMUSE00000736602";
chr4	processed_transcript	exon	131866366	131866419	.	+	.	gene_id "ENSMUSG00000086290"; transcript_id "ENSMUST00000128131"; exon_number "2"; gene_name "Snhg12"; gene_biotype "lincRNA"; transcript_name "Snhg12-004"; exon_id "ENSMUSE00000756485";
chr4	processed_transcript	exon	131866749	131866910	.	+	.	gene_id "ENSMUSG00000086290"; transcript_id "ENSMUST00000128131"; exon_number "3"; gene_name "Snhg12"; gene_biotype "lincRNA"; transcript_name "Snhg12-004"; exon_id "ENSMUSE00000778474";
chr4	processed_transcript	exon	131864593	131864822	.	+	.	gene_id "ENSMUSG00000086290"; transcript_id "ENSMUST00000137343"; exon_number "1"; gene_name "Snhg12"; gene_biotype "lincRNA"; transcript_name "Snhg12-006"; exon_id "ENSMUSE00000786237";
chr4	processed_transcript	exon	131865753	131865886	.	+	.	gene_id "ENSMUSG00000086290"; transcript_id "ENSMUST00000137343"; exon_number "2"; gene_name "Snhg12"; gene_biotype "lincRNA"; transcript_name "Snhg12-006"; exon_id "ENSMUSE00000767781";
chr4	processed_transcript	exon	131864593	131864822	.	+	.	gene_id "ENSMUSG00000086290"; transcript_id "ENSMUST00000144705"; exon_number "1"; gene_name "Snhg12"; gene_biotype "lincRNA"; transcript_name "Snhg12-001"; exon_id "ENSMUSE00000786237";
chr4	processed_transcript	exon	131865753	131865818	.	+	.	gene_id "ENSMUSG00000086290"; transcript_id "ENSMUST00000144705"; exon_number "2"; gene_name "Snhg12"; gene_biotype "lincRNA"; transcript_name "Snhg12-001"; exon_id "ENSMUSE00000780841";
chr4	processed_transcript	exon	131866066	131866130	.	+	.	gene_id "ENSMUSG00000086290"; transcript_id "ENSMUST00000144705"; exon_number "3"; gene_name "Snhg12"; gene_biotype "lincRNA"; transcript_name "Snhg12-001"; exon_id "ENSMUSE00000725178";
chr4	processed_transcript	exon	131866366	131866937	.	+	.	gene_id "ENSMUSG00000086290"; transcript_id "ENSMUST00000144705"; exon_number "4"; gene_name "Snhg12"; gene_biotype "lincRNA"; transcript_name "Snhg12-001"; exon_id "ENSMUSE00000792438";
chr4	processed_transcript	exon	131864608	131864822	.	+	.	gene_id "ENSMUSG00000086290"; transcript_id "ENSMUST00000153474"; exon_number "1"; gene_name "Snhg12"; gene_biotype "lincRNA"; transcript_name "Snhg12-002"; exon_id "ENSMUSE00000763661";
chr4	processed_transcript	exon	131865753	131865818	.	+	.	gene_id "ENSMUSG00000086290"; transcript_id "ENSMUST00000153474"; exon_number "2"; gene_name "Snhg12"; gene_biotype "lincRNA"; transcript_name "Snhg12-002"; exon_id "ENSMUSE00000780841";
chr4	processed_transcript	exon	131866066	131866130	.	+	.	gene_id "ENSMUSG00000086290"; transcript_id "ENSMUST00000153474"; exon_number "3"; gene_name "Snhg12"; gene_biotype "lincRNA"; transcript_name "Snhg12-002"; exon_id "ENSMUSE00000725178";
chr4	processed_transcript	exon	131866366	131866419	.	+	.	gene_id "ENSMUSG00000086290"; transcript_id "ENSMUST00000153474"; exon_number "4"; gene_name "Snhg12"; gene_biotype "lincRNA"; transcript_name "Snhg12-002"; exon_id "ENSMUSE00000756485";
chr4	processed_transcript	exon	131866749	131866939	.	+	.	gene_id "ENSMUSG00000086290"; transcript_id "ENSMUST00000153474"; exon_number "5"; gene_name "Snhg12"; gene_biotype "lincRNA"; transcript_name "Snhg12-002"; exon_id "ENSMUSE00000804727";
chr6	lincRNA	exon	52052948	52053035	.	+	.	gene_id "ENSMUSG00000085412"; transcript_id "ENSMUST00000125374"; exon_number "1"; gene_name "Gm15055"; gene_biotype "lincRNA"; transcript_name "Gm15055-001"; exon_id "ENSMUSE00000727089";
chr6	lincRNA	exon	52056770	52056895	.	+	.	gene_id "ENSMUSG00000085412"; transcript_id "ENSMUST00000125374"; exon_number "2"; gene_name "Gm15055"; gene_biotype "lincRNA"; transcript_name "Gm15055-001"; exon_id "ENSMUSE00000827643";
chr6	lincRNA	exon	52062351	52062531	.	+	.	gene_id "ENSMUSG00000085412"; transcript_id "ENSMUST00000125374"; exon_number "3"; gene_name "Gm15055"; gene_biotype "lincRNA"; transcript_name "Gm15055-001"; exon_id "ENSMUSE00000845948";
chr6	lincRNA	exon	52053002	52053035	.	+	.	gene_id "ENSMUSG00000085412"; transcript_id "ENSMUST00000155758"; exon_number "1"; gene_name "Gm15055"; gene_biotype "lincRNA"; transcript_name "Gm15055-002"; exon_id "ENSMUSE00000807849";
chr6	lincRNA	exon	52056770	52056895	.	+	.	gene_id "ENSMUSG00000085412"; transcript_id "ENSMUST00000155758"; exon_number "2"; gene_name "Gm15055"; gene_biotype "lincRNA"; transcript_name "Gm15055-002"; exon_id "ENSMUSE00000827643";
chr6	lincRNA	exon	52061940	52062187	.	+	.	gene_id "ENSMUSG00000085412"; transcript_id "ENSMUST00000155758"; exon_number "3"; gene_name "Gm15055"; gene_biotype "lincRNA"; transcript_name "Gm15055-002"; exon_id "ENSMUSE00000737447";
chr7	lincRNA	exon	74929611	74930178	.	-	.	gene_id "ENSMUSG00000097697"; transcript_id "ENSMUST00000181235"; exon_number "3"; gene_name "AC158296.2"; gene_biotype "lincRNA"; transcript_name "AC158296.2-201"; exon_id "ENSMUSE00001168899";
chr7	lincRNA	exon	74931285	74931480	.	-	.	gene_id "ENSMUSG00000097697"; transcript_id "ENSMUST00000181235"; exon_number "2"; gene_name "AC158296.2"; gene_biotype "lincRNA"; transcript_name "AC158296.2-201"; exon_id "ENSMUSE00001201644";
chr7	lincRNA	exon	74948251	74948382	.	-	.	gene_id "ENSMUSG00000097697"; transcript_id "ENSMUST00000181235"; exon_number "1"; gene_name "AC158296.2"; gene_biotype "lincRNA"; transcript_name "AC158296.2-201"; exon_id "ENSMUSE00001110110";
chr1	Guttman_lncRNA	exon	138567315	138567509	.	+	.	gene_id "ENSMUSG00000097113"; transcript_id "linc1422"; exon_number "1"; gene_name "linc1422"; gene_biotype "guttman_lncRNA"; transcript_name "linc1422"; exon_id "linc1422";
chr1	Guttman_lncRNA	exon	138571713	138571860	.	+	.	gene_id "ENSMUSG00000097113"; transcript_id "linc1422"; exon_number "2"; gene_name "linc1422"; gene_biotype "guttman_lncRNA"; transcript_name "linc1422"; exon_id "linc1422";
chr1	Guttman_lncRNA	exon	138573699	138573843	.	+	.	gene_id "ENSMUSG00000097113"; transcript_id "linc1422"; exon_number "3"; gene_name "linc1422"; gene_biotype "guttman_lncRNA"; transcript_name "linc1422"; exon_id "linc1422";
chr1	Guttman_lncRNA	exon	138585340	138585387	.	+	.	gene_id "ENSMUSG00000097113"; transcript_id "linc1422"; exon_number "4"; gene_name "linc1422"; gene_biotype "guttman_lncRNA"; transcript_name "linc1422"; exon_id "linc1422";
chr11	Guttman_lncRNA	exon	93994776	93994843	.	+	.	gene_id "ENSMUSG00000086003"; transcript_id "linc1448"; exon_number "1"; gene_name "linc1448"; gene_biotype "guttman_lncRNA"; transcript_name "linc1448"; exon_id "linc1448";
chr11	Guttman_lncRNA	exon	93999801	93999978	.	+	.	gene_id "ENSMUSG00000086003"; transcript_id "linc1448"; exon_number "2"; gene_name "linc1448"; gene_biotype "guttman_lncRNA"; transcript_name "linc1448"; exon_id "linc1448";
chr11	Guttman_lncRNA	exon	94016768	94016811	.	+	.	gene_id "ENSMUSG00000086003"; transcript_id "linc1448"; exon_number "3"; gene_name "linc1448"; gene_biotype "guttman_lncRNA"; transcript_name "linc1448"; exon_id "linc1448";
chr11	Guttman_lncRNA	exon	94016891	94017071	.	+	.	gene_id "ENSMUSG00000086003"; transcript_id "linc1448"; exon_number "4"; gene_name "linc1448"; gene_biotype "guttman_lncRNA"; transcript_name "linc1448"; exon_id "linc1448";
chr13	Guttman_lncRNA	exon	99870657	99870783	.	+	.	gene_id "ENSMUSG00000097848"; transcript_id "linc1470"; exon_number "1"; gene_name "linc1470"; gene_biotype "guttman_lncRNA"; transcript_name "linc1470"; exon_id "linc1470";
chr13	Guttman_lncRNA	exon	99875933	99877076	.	+	.	gene_id "ENSMUSG00000097848"; transcript_id "linc1470"; exon_number "2"; gene_name "linc1470"; gene_biotype "guttman_lncRNA"; transcript_name "linc1470"; exon_id "linc1470";
chr19	Guttman_lncRNA	exon	5842304	5844435	.	-	.	gene_id "ENSMUSG00000092274"; transcript_id "linc1317"; exon_number "1"; gene_name "linc1317"; gene_biotype "guttman_lncRNA"; transcript_name "linc1317"; exon_id "linc1317";
chr19	Guttman_lncRNA	exon	5844578	5844759	.	-	.	gene_id "ENSMUSG00000092274"; transcript_id "linc1317"; exon_number "2"; gene_name "linc1317"; gene_biotype "guttman_lncRNA"; transcript_name "linc1317"; exon_id "linc1317";
chr19	Guttman_lncRNA	exon	5844925	5845817	.	-	.	gene_id "ENSMUSG00000092274"; transcript_id "linc1317"; exon_number "3"; gene_name "linc1317"; gene_biotype "guttman_lncRNA"; transcript_name "linc1317"; exon_id "linc1317";
chr6	Guttman_lncRNA	exon	52052933	52053046	.	+	.	gene_id "ENSMUSG00000085412"; transcript_id "linc1547"; exon_number "1"; gene_name "linc1547"; gene_biotype "guttman_lncRNA"; transcript_name "linc1547"; exon_id "linc1547";
chr6	Guttman_lncRNA	exon	52056770	52056877	.	+	.	gene_id "ENSMUSG00000085412"; transcript_id "linc1547"; exon_number "2"; gene_name "linc1547"; gene_biotype "guttman_lncRNA"; transcript_name "linc1547"; exon_id "linc1547";
chr6	Guttman_lncRNA	exon	52062044	52062329	.	+	.	gene_id "ENSMUSG00000085412"; transcript_id "linc1547"; exon_number "3"; gene_name "linc1547"; gene_biotype "guttman_lncRNA"; transcript_name "linc1547"; exon_id "linc1547";
chr6	Guttman_lncRNA	exon	52062717	52064190	.	+	.	gene_id "ENSMUSG00000085412"; transcript_id "linc1547"; exon_number "4"; gene_name "linc1547"; gene_biotype "guttman_lncRNA"; transcript_name "linc1547"; exon_id "linc1547";
chr6	Guttman_lncRNA	exon	52064421	52064513	.	+	.	gene_id "ENSMUSG00000085412"; transcript_id "linc1547"; exon_number "5"; gene_name "linc1547"; gene_biotype "guttman_lncRNA"; transcript_name "linc1547"; exon_id "linc1547";
chr6	Guttman_lncRNA	exon	52064947	52065089	.	+	.	gene_id "ENSMUSG00000085412"; transcript_id "linc1547"; exon_number "6"; gene_name "linc1547"; gene_biotype "guttman_lncRNA"; transcript_name "linc1547"; exon_id "linc1547";
chr6	Guttman_lncRNA	exon	52065260	52065847	.	+	.	gene_id "ENSMUSG00000085412"; transcript_id "linc1547"; exon_number "7"; gene_name "linc1547"; gene_biotype "guttman_lncRNA"; transcript_name "linc1547"; exon_id "linc1547";
chr6	Guttman_lncRNA	exon	52066001	52066722	.	+	.	gene_id "ENSMUSG00000085412"; transcript_id "linc1547"; exon_number "8"; gene_name "linc1547"; gene_biotype "guttman_lncRNA"; transcript_name "linc1547"; exon_id "linc1547";
chr6	Guttman_lncRNA	exon	52066950	52067127	.	+	.	gene_id "ENSMUSG00000085412"; transcript_id "linc1547"; exon_number "9"; gene_name "linc1547"; gene_biotype "guttman_lncRNA"; transcript_name "linc1547"; exon_id "linc1547";
chr6	Guttman_lncRNA	exon	52067277	52067637	.	+	.	gene_id "ENSMUSG00000085412"; transcript_id "linc1547"; exon_number "10"; gene_name "linc1547"; gene_biotype "guttman_lncRNA"; transcript_name "linc1547"; exon_id "linc1547";
chr6	Guttman_lncRNA	exon	52067940	52068029	.	+	.	gene_id "ENSMUSG00000085412"; transcript_id "linc1547"; exon_number "11"; gene_name "linc1547"; gene_biotype "guttman_lncRNA"; transcript_name "linc1547"; exon_id "linc1547";
chr6	Guttman_lncRNA	exon	52068166	52068282	.	+	.	gene_id "ENSMUSG00000085412"; transcript_id "linc1547"; exon_number "12"; gene_name "linc1547"; gene_biotype "guttman_lncRNA"; transcript_name "linc1547"; exon_id "linc1547";
chr6	Guttman_lncRNA	exon	52068319	52069274	.	+	.	gene_id "ENSMUSG00000085412"; transcript_id "linc1547"; exon_number "13"; gene_name "linc1547"; gene_biotype "guttman_lncRNA"; transcript_name "linc1547"; exon_id "linc1547";
chr6	Guttman_lncRNA	exon	52069303	52069727	.	+	.	gene_id "ENSMUSG00000085412"; transcript_id "linc1547"; exon_number "14"; gene_name "linc1547"; gene_biotype "guttman_lncRNA"; transcript_name "linc1547"; exon_id "linc1547";
chr6	Guttman_lncRNA	exon	125382625	125382829	.	+	.	gene_id "linc1557"; transcript_id "linc1557"; exon_number "1"; gene_name "linc1557"; gene_biotype "guttman_lncRNA"; transcript_name "linc1557"; exon_id "linc1557";
chr6	Guttman_lncRNA	exon	125383052	125383255	.	+	.	gene_id "linc1557"; transcript_id "linc1557"; exon_number "2"; gene_name "linc1557"; gene_biotype "guttman_lncRNA"; transcript_name "linc1557"; exon_id "linc1557";
chr6	Guttman_lncRNA	exon	125407666	125407772	.	+	.	gene_id "linc1557"; transcript_id "linc1557"; exon_number "3"; gene_name "linc1557"; gene_biotype "guttman_lncRNA"; transcript_name "linc1557"; exon_id "linc1557";
chr6	Guttman_lncRNA	exon	125408370	125408897	.	+	.	gene_id "linc1557"; transcript_id "linc1557"; exon_number "4"; gene_name "linc1557"; gene_biotype "guttman_lncRNA"; transcript_name "linc1557"; exon_id "linc1557";
chr19	non_coding	exon	5844339	5844434	.	-	.	gene_id "ENSMUSG00000092274"; transcript_id "ENSMUST00000173714"; exon_number "2"; gene_name "Neat1"; gene_biotype "non_coding"; transcript_name "Neat1-004"; exon_id "ENSMUSE00000943764";
chr19	non_coding	exon	5844578	5844633	.	-	.	gene_id "ENSMUSG00000092274"; transcript_id "ENSMUST00000173714"; exon_number "1"; gene_name "Neat1"; gene_biotype "non_coding"; transcript_name "Neat1-004"; exon_id "ENSMUSE00000941967";
chr19	non_coding	exon	5842307	5844758	.	-	.	gene_id "ENSMUSG00000092274"; transcript_id "ENSMUST00000174287"; exon_number "2"; gene_name "Neat1"; gene_biotype "non_coding"; transcript_name "Neat1-002"; exon_id "ENSMUSE00000940043";
chr19	non_coding	exon	5844925	5845476	.	-	.	gene_id "ENSMUSG00000092274"; transcript_id "ENSMUST00000174287"; exon_number "1"; gene_name "Neat1"; gene_biotype "non_coding"; transcript_name "Neat1-002"; exon_id "ENSMUSE00000938797";
chr19	non_coding	exon	5843681	5844434	.	-	.	gene_id "ENSMUSG00000092274"; transcript_id "ENSMUST00000174829"; exon_number "4"; gene_name "Neat1"; gene_biotype "non_coding"; transcript_name "Neat1-003"; exon_id "ENSMUSE00000942741";
chr19	non_coding	exon	5844578	5844758	.	-	.	gene_id "ENSMUSG00000092274"; transcript_id "ENSMUST00000174829"; exon_number "3"; gene_name "Neat1"; gene_biotype "non_coding"; transcript_name "Neat1-003"; exon_id "ENSMUSE00000929604";
chr19	non_coding	exon	5844925	5844966	.	-	.	gene_id "ENSMUSG00000092274"; transcript_id "ENSMUST00000174829"; exon_number "2"; gene_name "Neat1"; gene_biotype "non_coding"; transcript_name "Neat1-003"; exon_id "ENSMUSE00000941037";
chr19	non_coding	exon	5845207	5845259	.	-	.	gene_id "ENSMUSG00000092274"; transcript_id "ENSMUST00000174829"; exon_number "1"; gene_name "Neat1"; gene_biotype "non_coding"; transcript_name "Neat1-003"; exon_id "ENSMUSE00000943851";
chr11	Guttman_lncRNA	exon	33434734	33437917	.	-	.	gene_id "linc1260"; transcript_id "linc1260"; exon_number "3";
chr11	Guttman_lncRNA	exon	33444253	33444682	.	-	.	gene_id "linc1260"; transcript_id "linc1260"; exon_number "1";
chr11	Guttman_lncRNA	exon	33440995	33441102	.	-	.	gene_id "linc1260"; transcript_id "linc1260"; exon_number "2";

## Sheet: singleexonic_elincRNA_gtf
chr1	Cufflinks	exon	51803846	51804451	.	+	.	gene_id "XLOC_000291"; transcript_id "TCONS_00002647"; exon_number "1";
chr1	Cufflinks	exon	88205133	88206690	.	+	.	gene_id "XLOC_000564"; transcript_id "TCONS_00000503"; exon_number "1";
chr1	Cufflinks	exon	135026005	135026936	.	+	.	gene_id "XLOC_000820"; transcript_id "TCONS_00000744"; exon_number "1";
chr1	Cufflinks	exon	135564142	135566485	.	+	.	gene_id "XLOC_000833"; transcript_id "TCONS_00002984"; exon_number "1";
chr10	Cufflinks	exon	21546359	21547385	.	+	.	gene_id "XLOC_002753"; transcript_id "TCONS_00006005"; exon_number "1";
chr11	Cufflinks	exon	20037249	20039521	.	+	.	gene_id "XLOC_004758"; transcript_id "TCONS_00007271"; exon_number "1";
chr11	Cufflinks	exon	116953308	116954265	.	+	.	gene_id "XLOC_006215"; transcript_id "TCONS_00011413"; exon_number "1";
chr13	Cufflinks	exon	17791134	17794983	.	+	.	gene_id "XLOC_010097"; transcript_id "TCONS_00015566"; exon_number "1";
chr15	Cufflinks	exon	77736036	77737127	.	+	.	gene_id "XLOC_014247"; transcript_id "TCONS_00022924"; exon_number "1";
chr16	Cufflinks	exon	13749111	13750006	.	+	.	gene_id "XLOC_015658"; transcript_id "TCONS_00025106"; exon_number "1";
chr16	Cufflinks	exon	32303909	32305082	.	+	.	gene_id "XLOC_015912"; transcript_id "TCONS_00024083"; exon_number "1";
chr16	Cufflinks	exon	32324193	32324738	.	+	.	gene_id "XLOC_015918"; transcript_id "TCONS_00025283"; exon_number "1";
chr16	Cufflinks	exon	84772549	84774033	.	+	.	gene_id "XLOC_016133"; transcript_id "TCONS_00025411"; exon_number "1";
chr17	Cufflinks	exon	37129288	37131980	.	+	.	gene_id "XLOC_017563"; transcript_id "TCONS_00028381"; exon_number "1";
chr17	Cufflinks	exon	88225276	88229061	.	+	.	gene_id "XLOC_017995"; transcript_id "TCONS_00026923"; exon_number "1";
chr18	Cufflinks	exon	56837020	56837575	.	+	.	gene_id "XLOC_019554"; transcript_id "TCONS_00029736"; exon_number "1";
chr2	Cufflinks	exon	116798439	116799348	.	+	.	gene_id "XLOC_022429"; transcript_id "TCONS_00036856"; exon_number "1";
chr2	Cufflinks	exon	154252339	154254200	.	+	.	gene_id "XLOC_022829"; transcript_id "TCONS_00037098"; exon_number "1";
chr2	Cufflinks	exon	165793743	165795294	.	+	.	gene_id "XLOC_022987"; transcript_id "TCONS_00034430"; exon_number "1";
chr3	Cufflinks	exon	35619769	35621125	.	+	.	gene_id "XLOC_025057"; transcript_id "TCONS_00040323"; exon_number "1";
chr3	Cufflinks	exon	88377003	88377402	.	+	.	gene_id "XLOC_025338"; transcript_id "TCONS_00038770"; exon_number "1";
chr3	Cufflinks	exon	95454805	95455230	.	+	.	gene_id "XLOC_025506"; transcript_id "TCONS_00040583"; exon_number "1";
chr3	Cufflinks	exon	95455389	95456295	.	+	.	gene_id "XLOC_025507"; transcript_id "TCONS_00040584"; exon_number "1";
chr4	Cufflinks	exon	129059633	129060402	.	+	.	gene_id "XLOC_027890"; transcript_id "TCONS_00042392"; exon_number "1";
chr4	Cufflinks	exon	130174495	130175460	.	+	.	gene_id "XLOC_027921"; transcript_id "TCONS_00044914"; exon_number "1";
chr6	Cufflinks	exon	39387892	39388140	.	+	.	gene_id "XLOC_033043"; transcript_id "TCONS_00050821"; exon_number "1";
chr6	Cufflinks	exon	122315739	122316241	.	+	.	gene_id "XLOC_033583"; transcript_id "TCONS_00051355"; exon_number "1";
chr7	Cufflinks	exon	19510761	19511157	.	+	.	gene_id "XLOC_035137"; transcript_id "TCONS_00054120"; exon_number "1";
chr8	Cufflinks	exon	86713767	86715539	.	+	.	gene_id "XLOC_038724"; transcript_id "TCONS_00061219"; exon_number "1";
chr9	Cufflinks	exon	44227398	44227945	.	+	.	gene_id "XLOC_040397"; transcript_id "TCONS_00062323"; exon_number "1";
chr9	Cufflinks	exon	78351270	78351683	.	+	.	gene_id "XLOC_040760"; transcript_id "TCONS_00064579"; exon_number "1";
chr1	Guttman_lncRNA	exon	121202185	121202284	.	+	.	gene_id "linc1418"; transcript_id "linc1418"; exon_number "1"; gene_name "linc1418"; gene_biotype "guttman_lncRNA"; transcript_name "linc1418"; exon_id "linc1418";
chr10	Cufflinks	exon	69829774	69832071	.	-	.	gene_id "XLOC_004022"; transcript_id "TCONS_00006759"; exon_number "1";
chr5	Cufflinks	exon	117852504	117855192	.	-	.	gene_id "XLOC_032353"; transcript_id "TCONS_00048339"; exon_number "1";
chr16	Cufflinks	exon	84772678	84774019	.	-	.	gene_id "XLOC_016817"; transcript_id "TCONS_00025854"; exon_number "1";
chr11	Cufflinks	exon	116294651	116295113	.	-	.	gene_id "XLOC_007945"; transcript_id "TCONS_00010256"; exon_number "1";
chr19	Cufflinks	exon	23161475	23162965	.	-	.	gene_id "XLOC_021281"; transcript_id "TCONS_00032009"; exon_number "1";
chr19	Cufflinks	exon	44354830	44355301	.	-	.	gene_id "XLOC_021469"; transcript_id "TCONS_00032973"; exon_number "1";
chr1	Cufflinks	exon	135566621	135568318	.	-	.	gene_id "XLOC_002128"; transcript_id "TCONS_00001956"; exon_number "1";
chr13	Cufflinks	exon	37531369	37531964	.	-	.	gene_id "XLOC_011274"; transcript_id "TCONS_00018047"; exon_number "1";
chr4	Cufflinks	exon	140838533	140840319	.	-	.	gene_id "XLOC_029617"; transcript_id "TCONS_00045922"; exon_number "1";
chr7	Cufflinks	exon	3209749	3212199	.	-	.	gene_id "XLOC_036484"; transcript_id "TCONS_00055478"; exon_number "1";
chr15	Cufflinks	exon	76888265	76889365	.	-	.	gene_id "XLOC_015105"; transcript_id "TCONS_00023471"; exon_number "1";
chr17	Cufflinks	exon	27176142	27177014	.	-	.	gene_id "XLOC_018391"; transcript_id "TCONS_00028902"; exon_number "1";
chr11	Cufflinks	exon	79787120	79789316	.	-	.	gene_id "XLOC_007295"; transcript_id "TCONS_00012092"; exon_number "1";
chr5	Cufflinks	exon	117849082	117849389	.	-	.	gene_id "XLOC_032351"; transcript_id "TCONS_00050299"; exon_number "1";
chr18	Cufflinks	exon	56837013	56837936	.	-	.	gene_id "XLOC_020126"; transcript_id "TCONS_00031008"; exon_number "1";
chr12	Cufflinks	exon	111187031	111188740	.	-	.	gene_id "XLOC_009927"; transcript_id "TCONS_00014325"; exon_number "1";
chr7	Cufflinks	exon	80761834	80762820	.	-	.	gene_id "XLOC_037354"; transcript_id "TCONS_00058611"; exon_number "1";
chr16	Cufflinks	exon	13749559	13750120	.	-	.	gene_id "XLOC_016350"; transcript_id "TCONS_00024493"; exon_number "1";
chr2	Cufflinks	exon	71704980	71705877	.	-	.	gene_id "XLOC_023798"; transcript_id "TCONS_00037701"; exon_number "1";
chr8	Cufflinks	exon	32178049	32178300	.	-	.	gene_id "XLOC_039274"; transcript_id "TCONS_00061556"; exon_number "1";
chr17	Cufflinks	exon	24168770	24169322	.	-	.	gene_id "XLOC_018309"; transcript_id "TCONS_00027179"; exon_number "1";
chr3	Cufflinks	exon	75457250	75459952	.	-	.	gene_id "XLOC_026247"; transcript_id "TCONS_00041021"; exon_number "1";
chr7	Cufflinks	exon	3201216	3202855	.	-	.	gene_id "XLOC_036482"; transcript_id "TCONS_00055477"; exon_number "1";
chr19	Cufflinks	exon	7335517	7336313	.	-	.	gene_id "XLOC_021148"; transcript_id "TCONS_00032772"; exon_number "1";
